# Supplementary material for: Crystal-field induced tuning of luminescence properties of Na3GaxAl1−xF6:Cr3+ phosphors with good thermal stability for NIR LEDs
Source: Royal Society of Chemistry journal article supplement (doi:10.1039/d2dt01559e), 2022-01-01
Supplement: d2dt01559e1.pdf [file d2dt01559e1.pdf]

**Electronic Supplementary Information**

**Crystal-field induced tuning of luminescence properties of  
 $\text{Na}_3\text{Ga}_x\text{Al}_{1-x}\text{F}_6:\text{Cr}^{3+}$  phosphors with good thermal stability  
for NIR LEDs**

Jianbang Zhou, Pengyun Chen, Junhao Li, Mingming Yang, Wei Jiang, Qihong Zhang,\* Haiyong Ni\* and Jiansheng Huo\*

Guangdong Province Key Laboratory of Rare Earth Development and Application,  
Institute of Resources Utilization and Rare Earth Development, Guangdong Academy  
of Sciences, Guangzhou 510651, PR China.

\* Corresponding author.

E-mail address: jshuosnu@126.com (J. Huo), wszqh@163.com (Q. Zhang),  
nhygd@163.com (H. Ni).

**Table S1** Lattice parameters of  $\text{Na}_3\text{Ga}_x\text{Al}_{1-x}\text{F}_6:0.05\text{Cr}^{3+}$  ( $x = 0, 0.25, 0.50, 0.75, 1.00$ ).

|                                                         | $a / \text{\AA}$ | $b / \text{\AA}$ | $c / \text{\AA}$ | $\beta / ^\circ$ |
|---------------------------------------------------------|------------------|------------------|------------------|------------------|
| $\text{Na}_3\text{AlF}_6$                               | 5.4075(3)        | 5.5917(2)        | 9.4511(6)        | 124.718(4)       |
| $\text{Na}_3\text{Ga}_{0.25}\text{Al}_{0.75}\text{F}_6$ | 5.4231(3)        | 5.6077(3)        | 9.4801(7)        | 124.695(6)       |
| $\text{Na}_3\text{Ga}_{0.5}\text{Al}_{0.5}\text{F}_6$   | 5.4336(3)        | 5.6218(3)        | 9.4992(7)        | 124.671(6)       |
| $\text{Na}_3\text{Ga}_{0.75}\text{Al}_{0.25}\text{F}_6$ | 5.4527(2)        | 5.6483(3)        | 9.5351(6)        | 124.611(5)       |
| $\text{Na}_3\text{GaF}_6$                               | 5.47288(15)      | 5.67811(14)      | 9.5716(2)        | 124.5644(16)     |

**Table S2** The actual content of  $\text{Cr}^{3+}$  in  $\text{Na}_3\text{Ga}_x\text{Al}_{1-x}\text{F}_6:0.05\text{Cr}^{3+}$  ( $x = 0, 0.25, 0.50, 0.75, 1.00$ ).

| x                            | 0    | 0.25 | 0.50 | 0.75 | 1.00 |
|------------------------------|------|------|------|------|------|
| $\text{Cr}^{3+}$ content (%) | 4.89 | 4.90 | 4.93 | 4.95 | 4.96 |
| IQE (%)                      | 16.1 | 19.2 | 23.7 | 28.5 | 28.1 |

**Table S3** IQE and EQE of  $\text{Na}_3\text{Ga}_{0.75}\text{Al}_{0.25}\text{F}_6:y\text{Cr}^{3+}$  ( $y = 0.01, 0.10, 0.20, 0.30, 0.35, 0.40$ ).

| y       | 0.01 | 0.10 | 0.20 | 0.30 | 0.35 | 0.40 |
|---------|------|------|------|------|------|------|
| IQE (%) | 13.2 | 34.5 | 38.3 | 41.2 | 50.0 | 39.7 |
| EQE (%) | 2.0  | 7.4  | 10.7 | 13.6 | 18.5 | 16.7 |

**Table S4** Fitting parameters Eq. 4.

| Parameter | $\Delta E$ (eV) | c      | $R^2$ | Standard Error |
|-----------|-----------------|--------|-------|----------------|
| Value     | 0.28            | 589.93 | 0.99  | 0.03           |

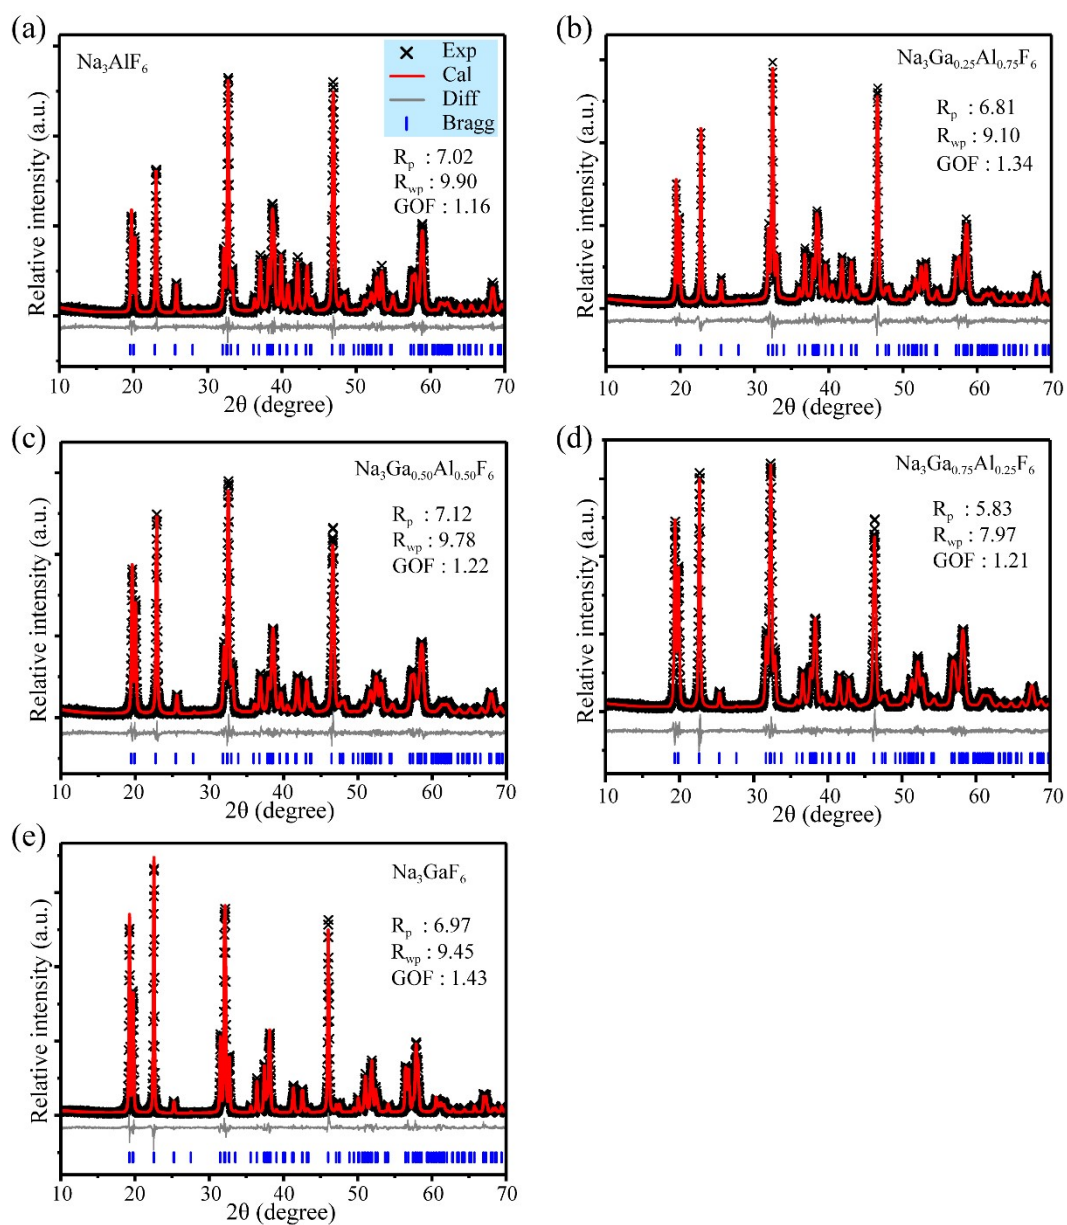

**Fig. S1** Rietveld refinement of (a)  $\text{Na}_3\text{AlF}_6:0.05\text{Cr}^{3+}$ , (b)  $\text{Na}_3\text{Ga}_{0.25}\text{Al}_{0.75}\text{F}_6:0.05\text{Cr}^{3+}$ , (c)  $\text{Na}_3\text{Ga}_{0.50}\text{Al}_{0.50}\text{F}_6:0.05\text{Cr}^{3+}$ , (d)  $\text{Na}_3\text{Ga}_{0.75}\text{Al}_{0.25}\text{F}_6:0.05\text{Cr}^{3+}$ , (e)  $\text{Na}_3\text{GaF}_6:0.05\text{Cr}^{3+}$ .

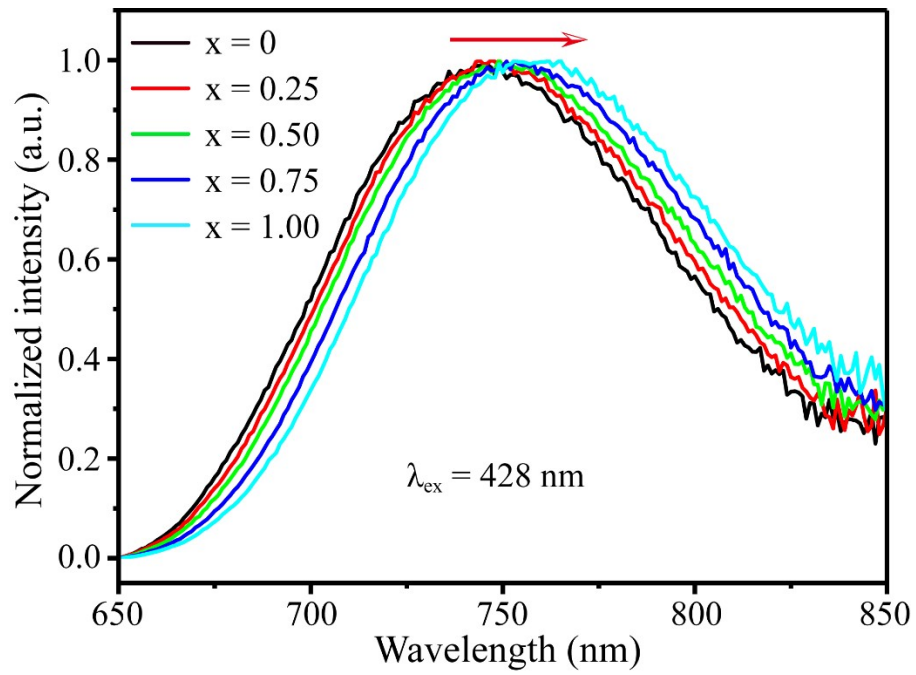

**Fig. S2** Normalized emission spectra of  $\text{Na}_3\text{Ga}_x\text{Al}_{1-x}\text{F}_6:0.05\text{Cr}^{3+}$  ( $x = 0, 0.25, 0.50, 0.75, 1.00$ ).

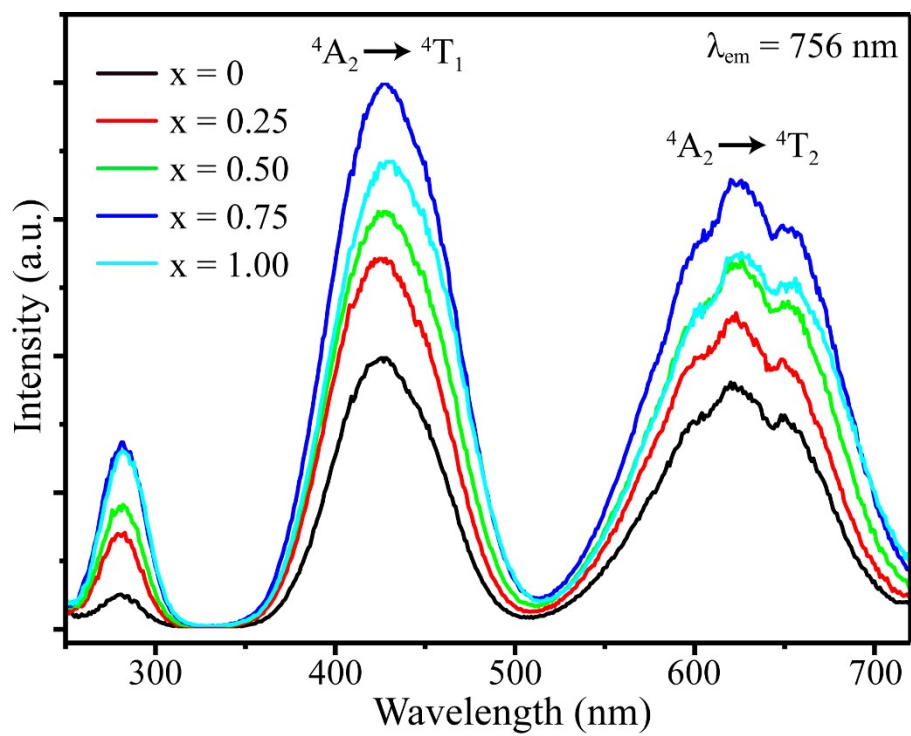

**Fig. S3** Excitation spectra of  $\text{Na}_3\text{Ga}_x\text{Al}_{1-x}\text{F}_6:0.05\text{Cr}^{3+}$  ( $x = 0, 0.25, 0.50, 0.75, 1.00$ ).

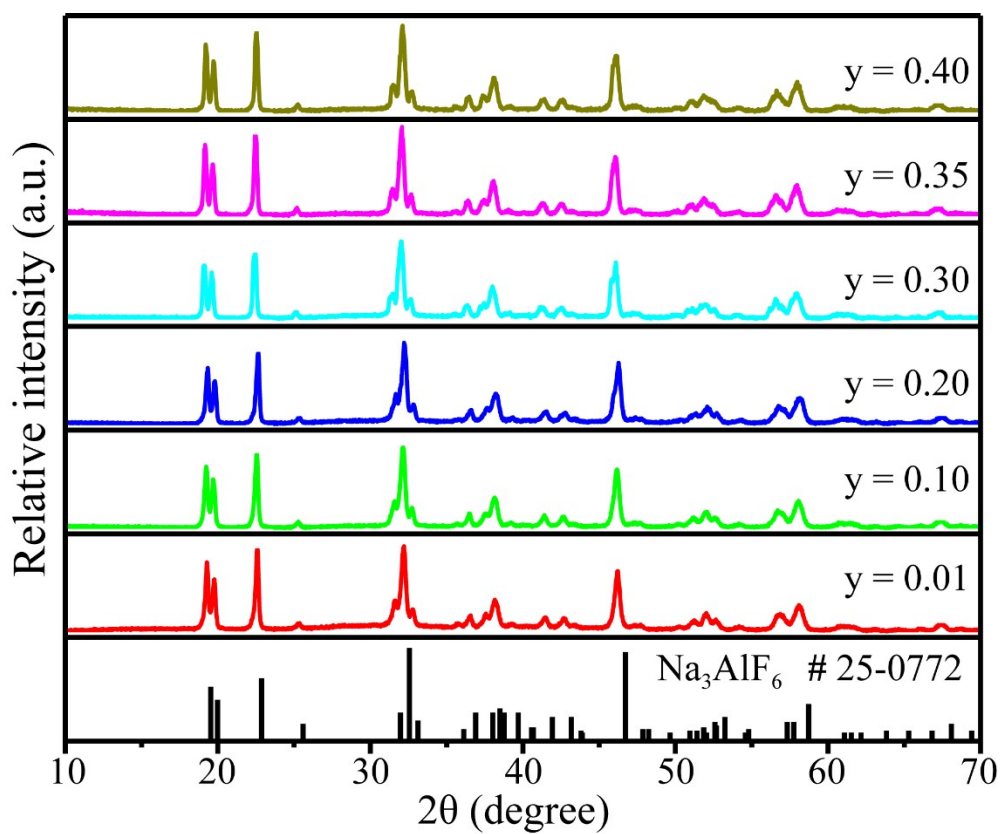

**Fig. S4** XRD patterns of  $\text{Na}_3\text{Ga}_{0.75}\text{Al}_{0.25}\text{F}_6:y\text{Cr}^{3+}$  ( $y = 0.01, 0.10, 0.20, 0.30, 0.35, 0.40$ ).

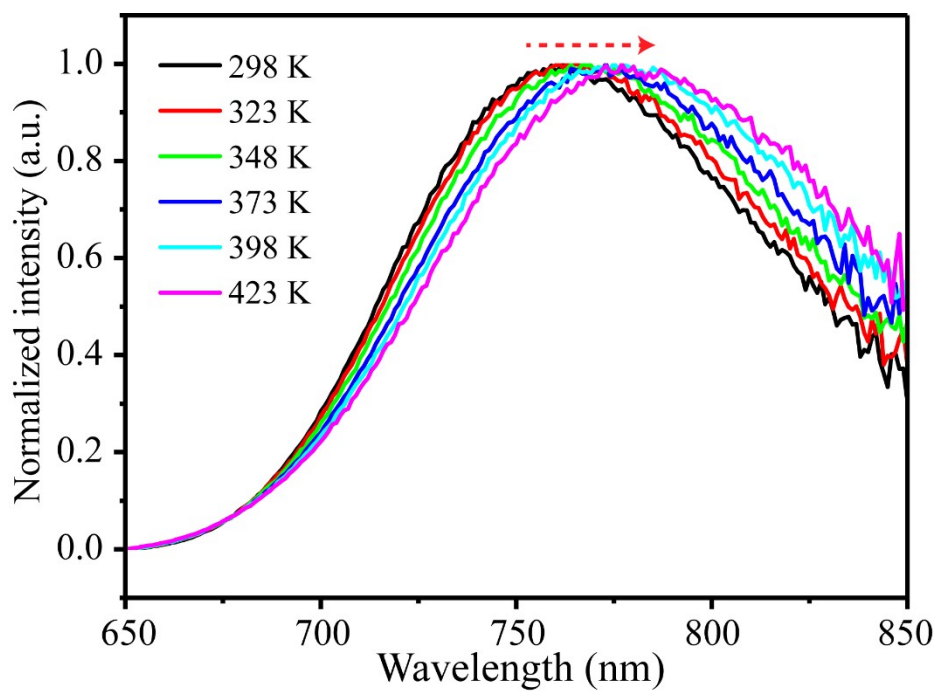

**Fig. S5** Normalized temperature-dependent emission spectra of  $\text{Na}_3\text{Ga}_{0.75}\text{Al}_{0.25}\text{F}_6:0.35\text{Cr}^{3+}$ .

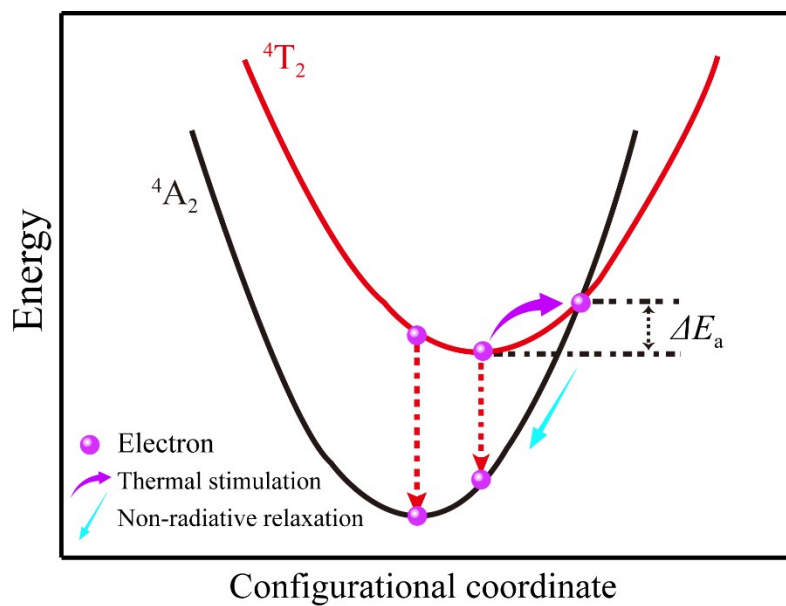

**Fig. S6** Configurational coordinate diagram illustrating band broadening and thermal quenching behaviors of  $\text{Na}_3\text{Ga}_{0.75}\text{Al}_{0.25}\text{F}_6:0.35\text{Cr}^{3+}$ .
